# Supplementary material
Source: Springer Nature journal article supplement (https://www.springermedizin.de/resource/supplementary/12891_2011_1236_MOESM2_ESM.pdf/9507418)

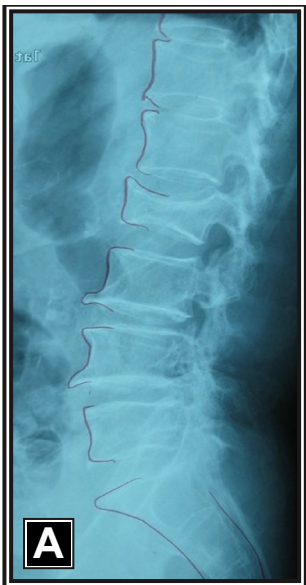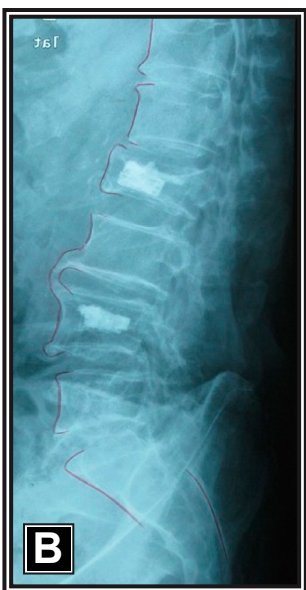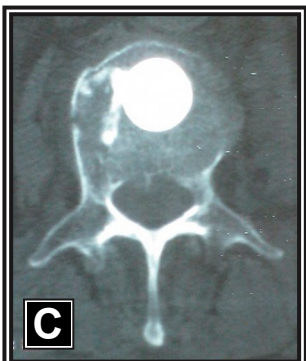

Supplement: MOESM2 [file 9507418]
